# Supplementary material for: Polyoxometalate-mediated syntheses of three structurally new silver clusters
Source: Royal Society of Chemistry journal article supplement (doi:10.1039/d4nr02016b), 2024-01-01
Supplement: d4nr02016b1.pdf [file d4nr02016b1.pdf]

# Electronic Supplementary Information

## Polyoxometalate-mediated syntheses of three structurally new silver clusters

Jing Zhang, Yuanyuan Dong, Lan Deng, Manzhou Chi, Yeqin Feng, Mengyun Zhao,  
Hongjin Lv\*, and Guo-Yu Yang

*MOE Key Laboratory of Cluster Science, Beijing Key Laboratory of  
Photoelectric/Electrophotonic Conversion Materials, School of Chemistry and  
Chemical Engineering, Beijing Institute of Technology, Beijing 102488, P. R. China*

Corresponding author. E-mail: [hlv@bit.edu.cn](mailto:hlv@bit.edu.cn)

### Table of contents

|                                                                                                                                                                                                                                                                       |   |
|-----------------------------------------------------------------------------------------------------------------------------------------------------------------------------------------------------------------------------------------------------------------------|---|
| 1. Experimental Section .....                                                                                                                                                                                                                                         | 3 |
| 2. Single-Crystal X-ray Crystallography .....                                                                                                                                                                                                                         | 4 |
| 3. Bond valence sum (BVS) calculation .....                                                                                                                                                                                                                           | 5 |
| 4. Fig. S1 The digital photographs of $\text{Ag}_{24}$ , $\text{Ag}_{16}\text{Co}_8$ and $\text{Ag}_{22}\text{Cu}$ crystals taken under the microscope. ....                                                                                                          | 5 |
| 5. Fig. S2 Three different coordination modes of Ag atoms in $\text{Ag}_{24}$ . ....                                                                                                                                                                                  | 6 |
| 6. Fig. S3 The coordination modes of 11 $^i\text{PrS}^-$ ligands towards Ag atoms in $\text{Ag}_{24}$ cluster. Color codes:<br>green, Ag; yellow, S; red, O; blue, W; orange, Si; black, Cl; dark blue, C. ....                                                       | 6 |
| 7. Fig. S4 The $\text{Ag}_5\text{CuS}_5$ unit in $\text{Ag}_{22}\text{Cu}$ cluster. Color codes: green, Ag; yellow, S; brown, Cu. ....                                                                                                                                | 7 |
| 8. Fig. S5 The coordination modes of 6 $^i\text{PrS}^-$ ligands towards Ag atoms in $\text{Ag}_{16}\text{Co}_8$ cluster. Color codes:<br>green, Ag; blue, W; orange, Si; yellow, S; red, O; brown, Cu; gray, C; purple, Co; brown, C; dark blue,<br>C; white, C. .... | 7 |

|                                                                                                                                                                                                                          |    |
|--------------------------------------------------------------------------------------------------------------------------------------------------------------------------------------------------------------------------|----|
| 9. Fig. S6 FT-IR spectra of (a) Ag <sub>24</sub> , (b) Ag <sub>22</sub> Cu and (c) Ag <sub>16</sub> Co <sub>8</sub> clusters before and after photothermal tests. ....                                                   | 8  |
| 10. Fig. S7 The UV-vis absorption spectra of (a) Ag <sub>24</sub> and (b) Ag <sub>22</sub> Cu dissolved in DMF and (c) Ag <sub>16</sub> Co <sub>8</sub> dissolved in DMSO at room temperature. ....                      | 8  |
| 11. Fig. S8 Experimental and simulated PXRD patterns of (a) Ag <sub>24</sub> , (b) Ag <sub>22</sub> Cu and (c) Ag <sub>16</sub> Co <sub>8</sub> clusters. ....                                                           | 8  |
| 12. Fig. S9 (a) XPS survey spectrum of Ag <sub>24</sub> cluster; high resolution XPS spectra of (b) Ag 3d, (c) Cl 2p, (d) P 2p, (e) S 2p and (f) W 4f in Ag <sub>24</sub> cluster. ....                                  | 9  |
| 13. Fig. S10 (a) XPS survey spectrum of Ag <sub>22</sub> Cu cluster; high resolution XPS spectra of (b) Ag 3d, (c) Cl 2p, (d) P 2p, (e) S 2p and (f) W 4f in Ag <sub>22</sub> Cu cluster. ....                           | 9  |
| 14. Fig. S11 (a) XPS survey spectrum of Ag <sub>16</sub> Co <sub>8</sub> cluster; high resolution XPS spectra of (b) Ag 3d, (c) Cl 2p, (d) P 2p, (e) S 2p and (f) W 4f in Ag <sub>16</sub> Co <sub>8</sub> cluster. .... | 10 |
| 15. Fig. S12 (a) SEM and elemental mapping images, and (b) EDS result of Ag <sub>24</sub> . ....                                                                                                                         | 11 |
| 16. Fig. S13 (a) SEM and elemental mapping images, and (b) EDS result of Ag <sub>16</sub> Co <sub>8</sub> . ....                                                                                                         | 12 |
| 17. Fig. S14 TGA curves of (a) Ag <sub>24</sub> , (b) Ag <sub>22</sub> Cu and (c) Ag <sub>16</sub> Co <sub>8</sub> at a scanning rate of 10 °C/min under air atmosphere. ....                                            | 12 |
| 18. Fig. S15 The solid-state UV-vis spectra of (a) Ag <sub>24</sub> , (b) Ag <sub>22</sub> Cu and (c) Ag <sub>16</sub> Co <sub>8</sub> clusters. ....                                                                    | 13 |
| 19. Fig. S16 Plots of maximum emission intensity of (a) Ag <sub>24</sub> , (b) Ag <sub>22</sub> Cu, and (c) Ag <sub>16</sub> Co <sub>8</sub> versus temperature in the range of 83 – 293 K. ....                         | 13 |
| 20. Table S1. Crystal data and structure refinements for Ag <sub>24</sub> , Ag <sub>22</sub> Cu and Ag <sub>16</sub> Co <sub>8</sub> . ....                                                                              | 14 |
| 21. Table S2. Selected bond distances (Å) for Ag <sub>24</sub> . ....                                                                                                                                                    | 15 |
| 22. Table S3. BVS values for Si and W atoms of Ag <sub>24</sub> . ....                                                                                                                                                   | 20 |
| 23. Table S4. Selected bond distances (Å) for Ag <sub>22</sub> Cu. ....                                                                                                                                                  | 20 |
| 24. Table S5. BVS values for Si and W atoms of Ag <sub>22</sub> Cu. ....                                                                                                                                                 | 23 |
| 25. Table S6. Selected bond distances (Å) for Ag <sub>16</sub> Co <sub>8</sub> . ....                                                                                                                                    | 23 |
| 26. Table S7. BVS values for Si, W, Co and O atoms of Ag <sub>16</sub> Co <sub>8</sub> . ....                                                                                                                            | 25 |
| 27. Table S8. Comparison of photothermal performance to the reported literature works. ....                                                                                                                              | 26 |
| 28. References. ....                                                                                                                                                                                                     | 26 |

## Experimental Section

**Chemicals and Materials.** The (<sup>i</sup>PrSAg)<sub>n</sub> precursor and the TBA<sub>4</sub>H<sub>6</sub>[ $\alpha$ -SiW<sub>9</sub>O<sub>34</sub>] were synthesized according to previously reported procedures.<sup>1, 2</sup> The chemicals and solvents used in the syntheses were purchased from commercial sources and used as received without further purification. <sup>i</sup>PrSH (Adamas-beta®) was purchased from Shanghai Titan Scientific Co.,Ltd and used as received. Silver acetate (CH<sub>3</sub>COOAg) was purchased from Shanghai Macklin Biochemical Co., Ltd and used as received. Silver nitrate (AgNO<sub>3</sub>) was purchased from Sinopharm Chemical Reagent Co., Ltd and used as received.

**Characterization.** The FT-IR spectra were performed on a Bruker Tensor II spectrometer using ~2 wt% KBr pellets in the range of 4000 ~ 400 cm<sup>-1</sup>. The UV-Vis spectra were acquired on a Techcomp UV 2600 spectrophotometer at room temperature in the 200 ~ 800 nm range. Single-crystal X-ray crystallography was carried out on a Bruker D8 Venture diffractometer operated at 40 kV and 40 mA with Mo K $\alpha$  radiation ( $\lambda = 0.71073 \text{ \AA}$ ). The X-ray Photoelectron Spectrum (XPS) was measured on a PHI5000 Versaprobe III. The steady-state luminescence quenching spectra was measured using Edinburgh Instruments FS5 Spectrofluorometer. Emission lifetime was measured with an EPL-365 picosecond pulsed diode laser system (pulse output 365 nm). The XPS data were carried out on a PHI 5000 Versaprobe III instrument. The Scanning electron microscopy (SEM)/EDS measurements were carried out on a ZEISS supra55. Powder X-ray diffraction (PXRD) analyses were measured on a MiniFlex 600 diffractometer with a Cu-K $\alpha$  X-ray radiation source. The photoluminescence performance of three crystal powders was tested using Edinburgh Instruments spectrofluorometer FLS1000. Photothermal measurements were conducted using Laser MGL-III-532nm-300mW. The photothermal behavior of the sample was monitored by thermal imaging camera (Fotric 326C). Infrared photos and real-time temperatures were extracted from the video by FLIR tools software.

**Synthesis of <sup>i</sup>PrSAg.** Silver nitrate (AgNO<sub>3</sub>) was added to 75 ml of acetonitrile and dissolved by ultrasonication, 2.8 ml of isopropyl mercaptan and 5 ml of triethylamine were dissolved in 100 ml of ethanol solution, mixed and stirred for 3 hours at room temperature in darkness, filtered and separated

to obtain a yellow powder of silver isopropyl mercaptan, washed with 10 ml of ethanol and 20 ml of ethyl ether, and dried in vacuum (yield 97%).

**Synthesis of [(SiW<sub>9</sub>O<sub>34</sub>)@Ag<sub>24</sub>(<sup>i</sup>PrS)<sub>11</sub>(DPPP)<sub>6</sub>Cl]<sub>2</sub>(SiW<sub>12</sub>O<sub>40</sub>) (Ag<sub>24</sub>).** AgOAc (0.1 mmol, 16.7 mg) and TBA<sub>4</sub>H<sub>6</sub>[SiW<sub>9</sub>O<sub>34</sub>] (100 mg) were added in a mixture of acetonitrile (3 mL) and deionized water (50 μL). After stirring for two hours at room temperature, <sup>i</sup>PrSAg (0.109 mmol, 20 mg), 1,3-Bis(diphenylphosphino)propane (0.073 mmol, 30 mg), acetonitrile (2 ml) and *N,N*-dimethylformamide (1 mL) were added in turn. Then the mixed reactants were transferred to a 25 mL Teflon bottles and tightly sealed in stainless steel autoclaves. The solvothermal procedure was carried out on a temperature-controlled electric oven at 60 °C for 48 h. When the solution cooled to room temperature, the orange crystals of Ag<sub>24</sub> were obtained immediately with a yield of 0.03 g (34.7%, based on Ag).

**Synthesis of [(SiW<sub>9</sub>O<sub>34</sub>)@Ag<sub>22</sub>Cu(<sup>i</sup>PrS)<sub>11</sub>(DPPP)<sub>6</sub>Cl](SbF<sub>6</sub>)<sub>2</sub> (Ag<sub>22</sub>Cu).** Synthesis of Ag<sub>22</sub>Cu was the same as that of Ag<sub>24</sub>, except adding some extra copper acetylacetonate (15 mg, 0.057 mmol) and sodium hexafluoroantimonate (10 mg, 0.039 mmol) in the last step. Orange block crystals Ag<sub>22</sub>Cu were isolated after 1 month in ~17.9% yield (0.014 g, based on Ag).

**Synthesis of {Ag<sub>16</sub>(<sup>i</sup>PrS)<sub>6</sub>(DPPP)<sub>8</sub>(CH<sub>3</sub>COO)<sub>4</sub>[Co<sub>4</sub>(OH)<sub>3</sub>SiW<sub>9</sub>O<sub>33</sub>]<sub>2</sub>}(CH<sub>3</sub>CN)<sub>4</sub>(H<sub>2</sub>O)<sub>2</sub> (Ag<sub>16</sub>Co<sub>8</sub>).** Synthesis of Ag<sub>16</sub>Co<sub>8</sub> was similar to Ag<sub>24</sub> cluster, except cobalt acetylacetonate (60 mg, 0.233 mmol) was additional in the last step. Red block crystals Ag<sub>16</sub>Co<sub>8</sub> were obtained immediately with a yield of 0.029 g (20.6%, based on Ag) when the solution cooled to room temperature.

## Single-Crystal X-ray Crystallography

The crystals of Ag<sub>24</sub>, Ag<sub>22</sub>Cu and Ag<sub>16</sub>Co<sub>8</sub> with appropriate dimensions were selected under an optical microscope and quickly immersed in crystal oil to prevent decomposition at both ends for data collection at 180 K. Crystallographic data were collected on a Bruker SMART APEX II CCD diffractometer with Mo K $\alpha$  radiation (graphite monochromator,  $\lambda = 0.71073$  Å). Data collection, indexing, and initial cell refinements were all performed using APEX II software. Frame integration

and final cell refinements were done using SAINT software based on optimal reflections. By using the Superflip structure solving program, Olex2 was used to solve the structure by charge flipping, and ShelXL was used to optimize the structure by least-squares. All non-H atoms of the complexes were refined with anisotropic thermal parameters. Hydrogen atoms in **Ag<sub>24</sub>** and **Ag<sub>22</sub>Cu** were included in idealized positions and refined in a fixed geometry with respect to their carrier atoms. Crystal structure graphics and their packing diagrams were carried out by using Diamond 4 software. CCDC 2312087, 2343569 and 2336489 contain the supplementary crystallographic data for **Ag<sub>24</sub>**, **Ag<sub>22</sub>Cu** and **Ag<sub>16</sub>Co<sub>8</sub>**, respectively. The crystallographic data can be obtained from The Cambridge Crystallographic Data Centre via [www.ccdc.cam.ac.uk/data\\_request/cif](http://www.ccdc.cam.ac.uk/data_request/cif).

## Bond valence sum (BVS) calculation

The BVS values were calculated by the expression for the variation of the length  $r_{ab}$  of a bond between two atoms a and b in observed crystal with valence  $V_a$ .<sup>3</sup>

$$V_a = \sum \exp\left(\frac{r_0 - r_{ab}}{B}\right)$$

where B is constant equal to 0.37 Å,  $r_0$  is bond valence parameter for a given atom pair.

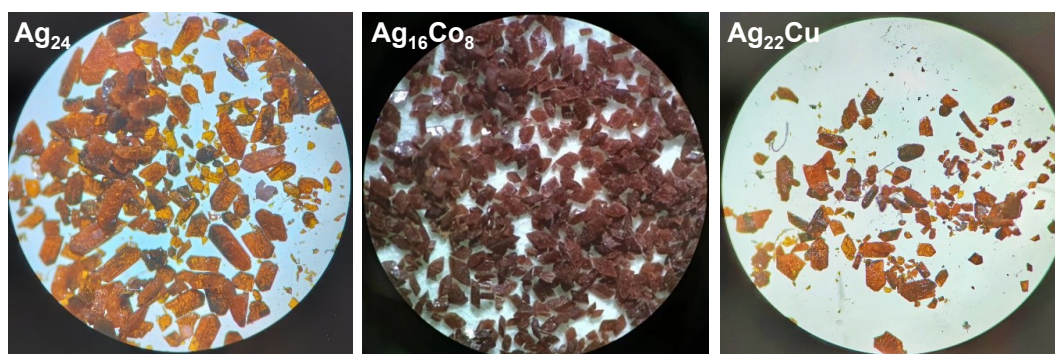

**Fig. S1** The digital photographs of **Ag<sub>24</sub>**, **Ag<sub>16</sub>Co<sub>8</sub>** and **Ag<sub>22</sub>Cu** crystals taken under the microscope.

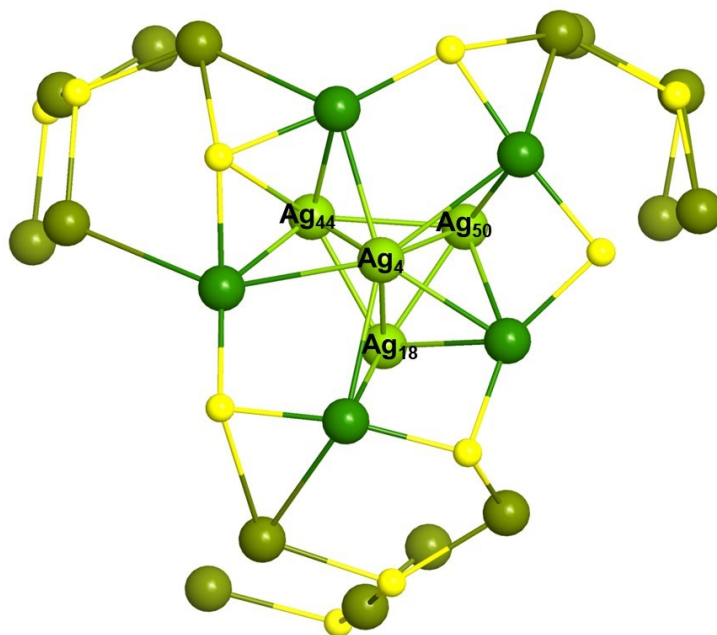

**Fig. S2** Three different coordination modes of Ag atoms in  $\text{Ag}_{24}$ .

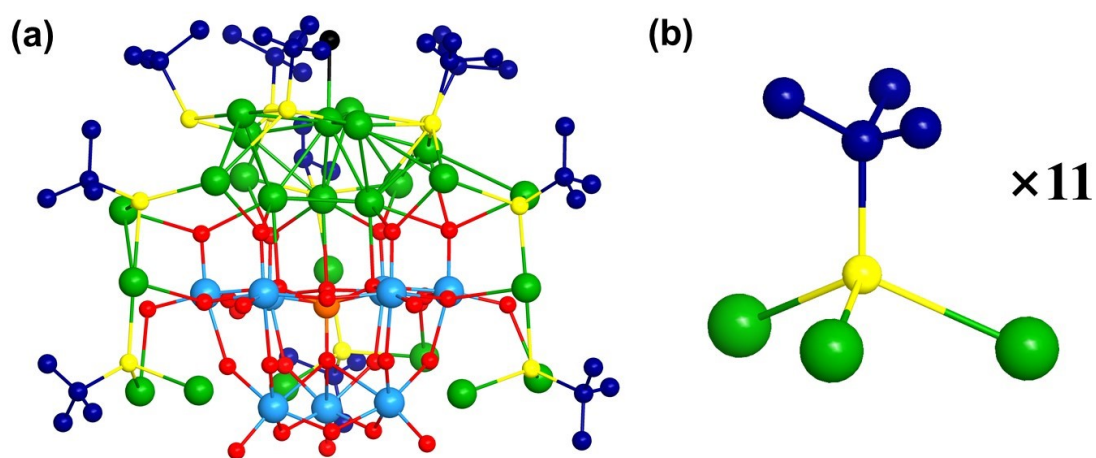

**Fig. S3** The coordination modes of 11  $\text{PrS}^-$  ligands towards Ag atoms in  $\text{Ag}_{24}$  cluster. Color codes: green, Ag; yellow, S; red, O; blue, W; orange, Si; black, Cl; dark blue, C.

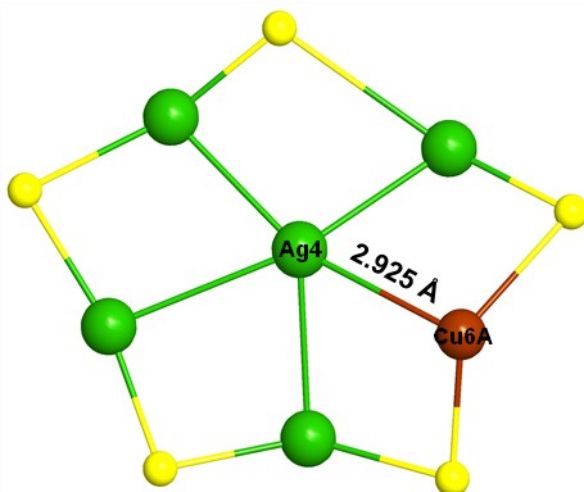

**Fig. S4** The  $\text{Ag}_5\text{CuS}_5$  unit in  $\text{Ag}_{22}\text{Cu}$  cluster. Color codes: green, Ag; yellow, S; brown, Cu.

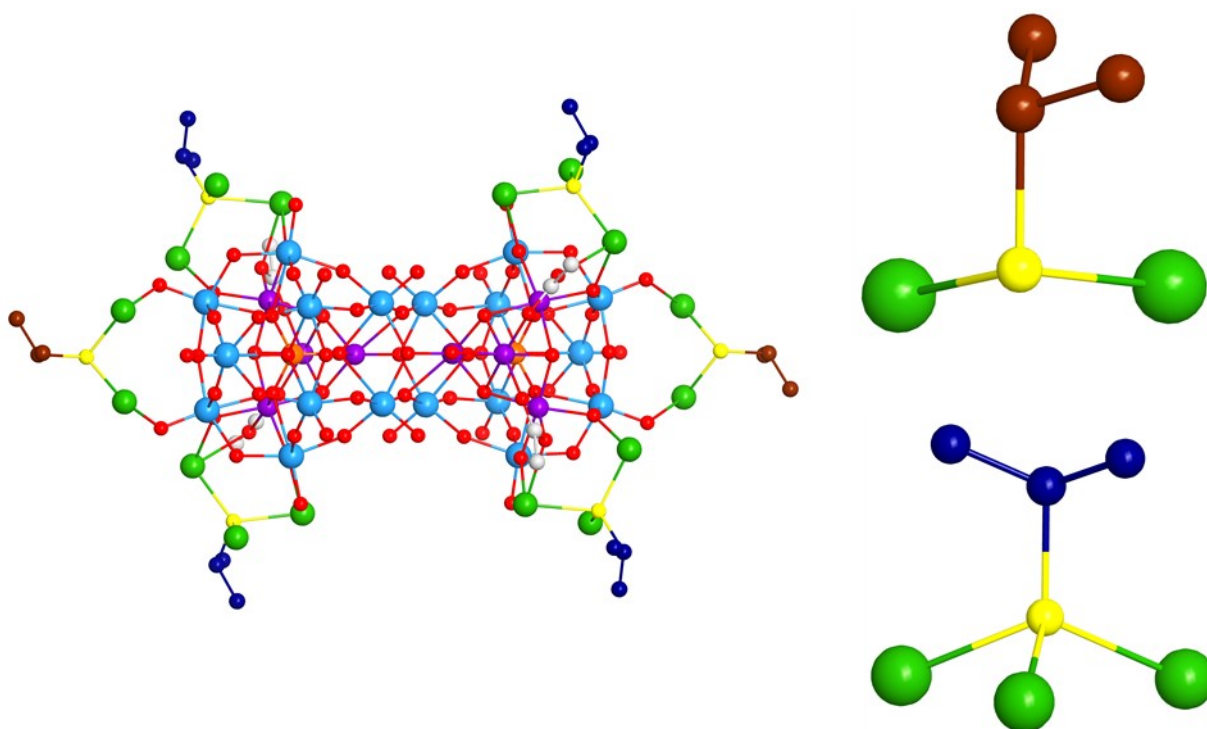

**Fig. S5** The coordination modes of 6  $6'\text{PrS}^-$  ligands towards Ag atoms in  $\text{Ag}_{16}\text{Co}_8$  cluster. Color codes: green, Ag; blue, W; orange, Si; yellow, S; red, O; brown, Cu; gray, C; purple, Co; brown, C; dark blue, C; white, C.

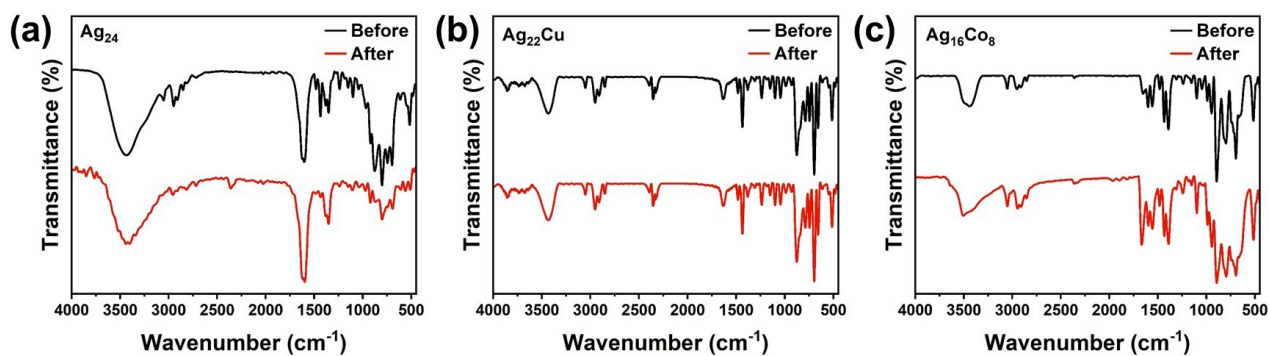

**Fig. S6** FT-IR spectra of (a)  $\text{Ag}_{24}$ , (b)  $\text{Ag}_{22}\text{Cu}$  and (c)  $\text{Ag}_{16}\text{Co}_8$  clusters before and after photothermal tests.

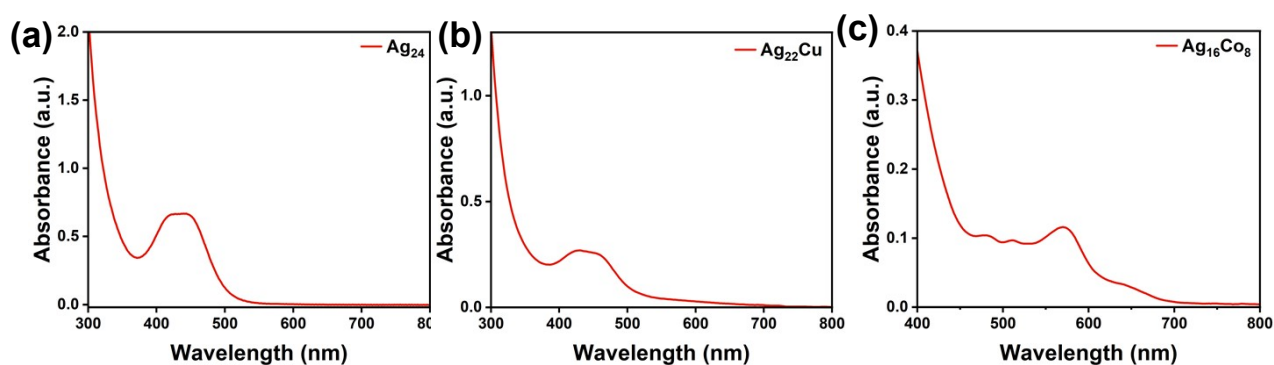

**Fig. S7** The UV-vis absorption spectra of (a)  $\text{Ag}_{24}$  and (b)  $\text{Ag}_{22}\text{Cu}$  dissolved in DMF and (c)  $\text{Ag}_{16}\text{Co}_8$  dissolved in DMSO at room temperature.

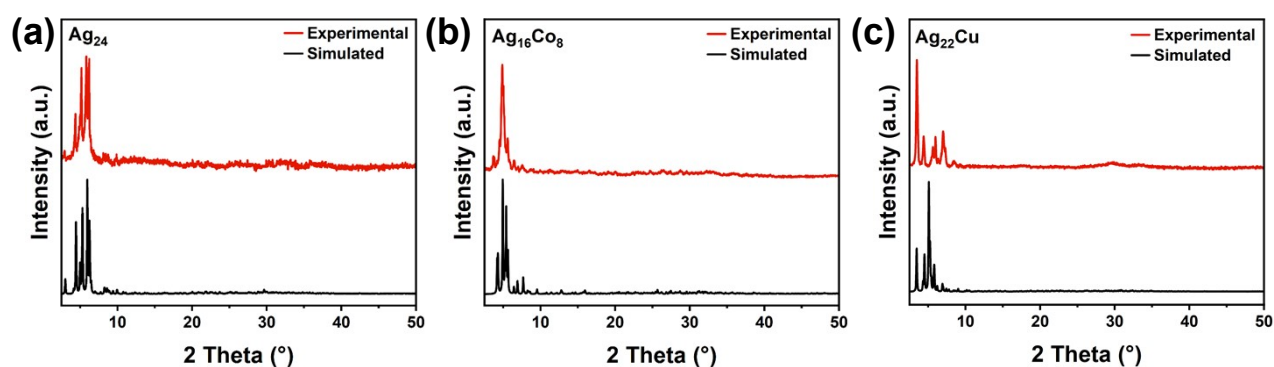

**Fig. S8** Experimental and simulated PXRD patterns of (a)  $\text{Ag}_{24}$ , (b)  $\text{Ag}_{22}\text{Cu}$  and (c)  $\text{Ag}_{16}\text{Co}_8$  clusters.



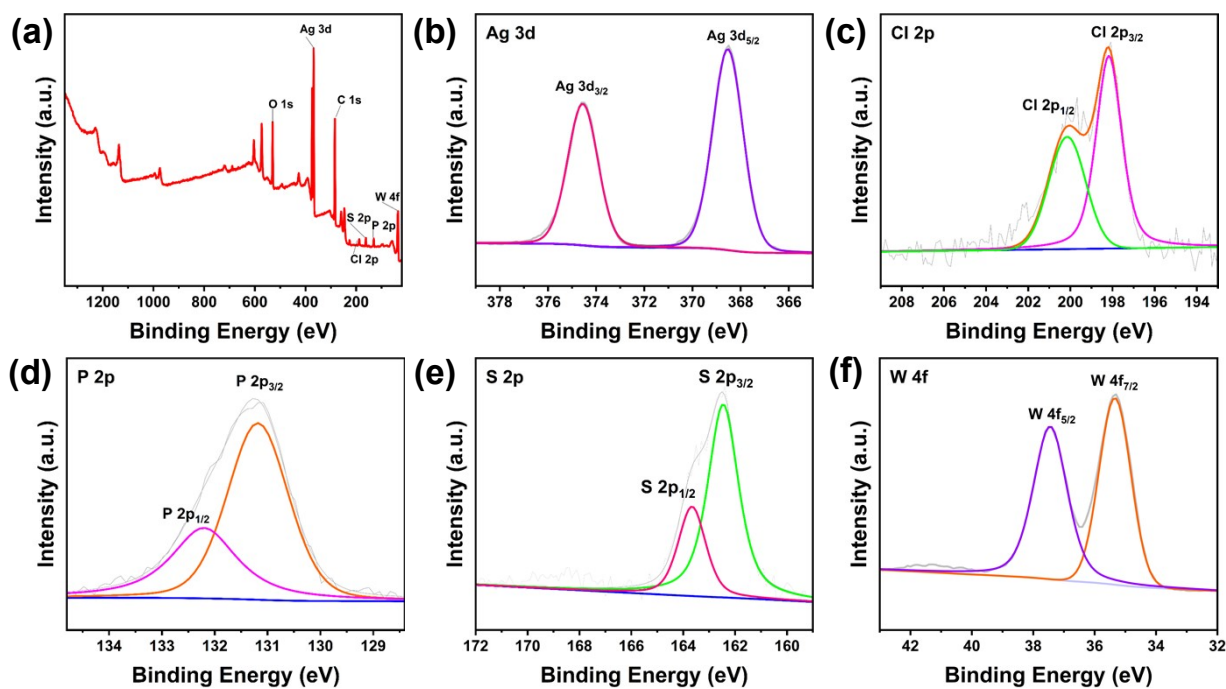

**Fig. S9** (a) XPS survey spectrum of  $\text{Ag}_{24}$  cluster; high resolution XPS spectra of (b) Ag 3d, (c) Cl 2p, (d) P 2p, (e) S 2p and (f) W 4f in  $\text{Ag}_{24}$  cluster.

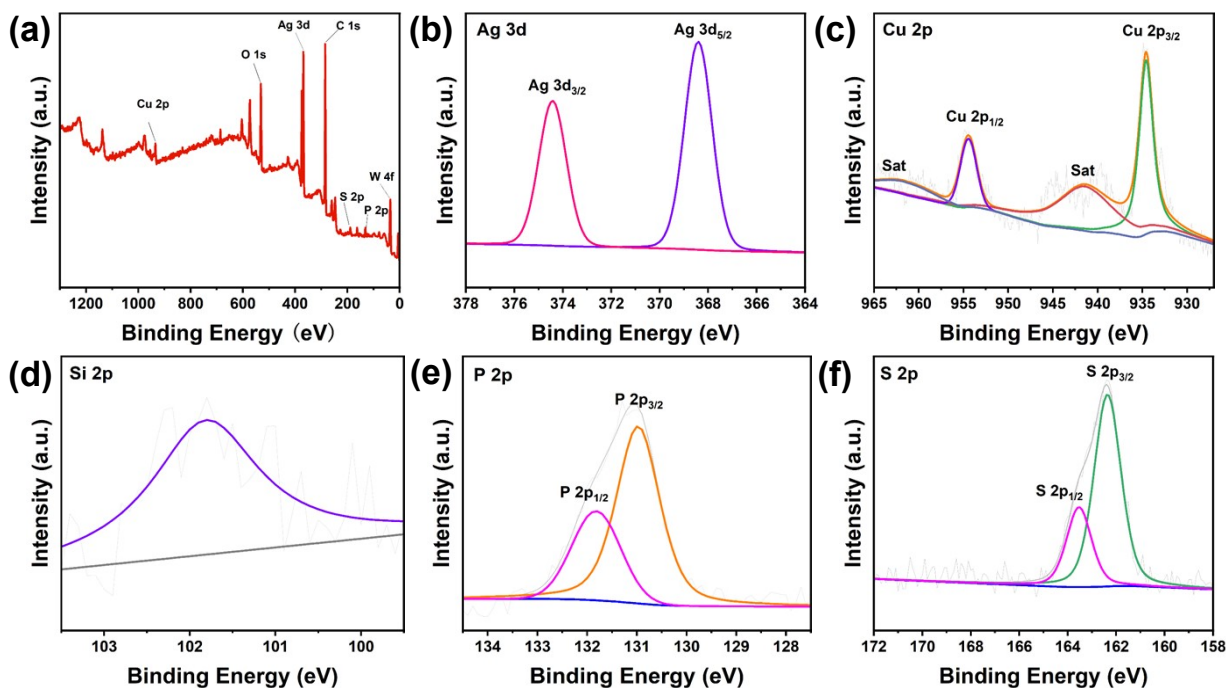

**Fig. S10** (a) XPS survey spectrum of  $\text{Ag}_{22}\text{Cu}$  cluster; high resolution XPS spectra of (b) Ag 3d, (c) Cl 2p, (d) P 2p, (e) S 2p and (f) W 4f in  $\text{Ag}_{22}\text{Cu}$  cluster.

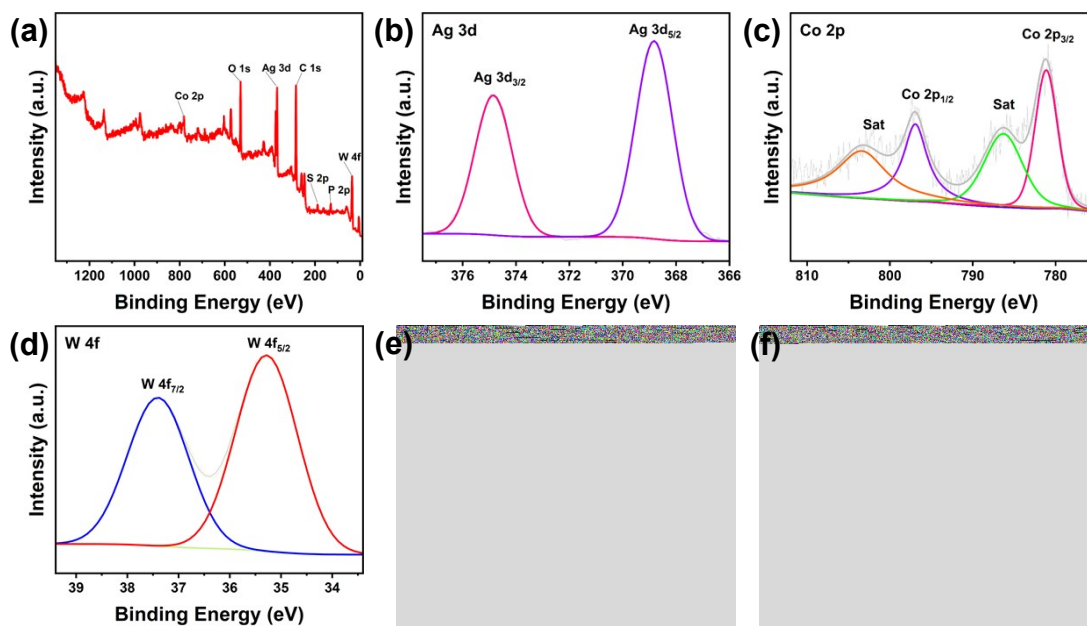

**Fig. S11** (a) XPS survey spectrum of  $\text{Ag}_{16}\text{Co}_8$  cluster; high resolution XPS spectra of (b) Ag 3d, (c) Co 2p, (d) W 4f, (e) S 2p and (f) P 2p in  $\text{Ag}_{16}\text{Co}_8$  cluster.

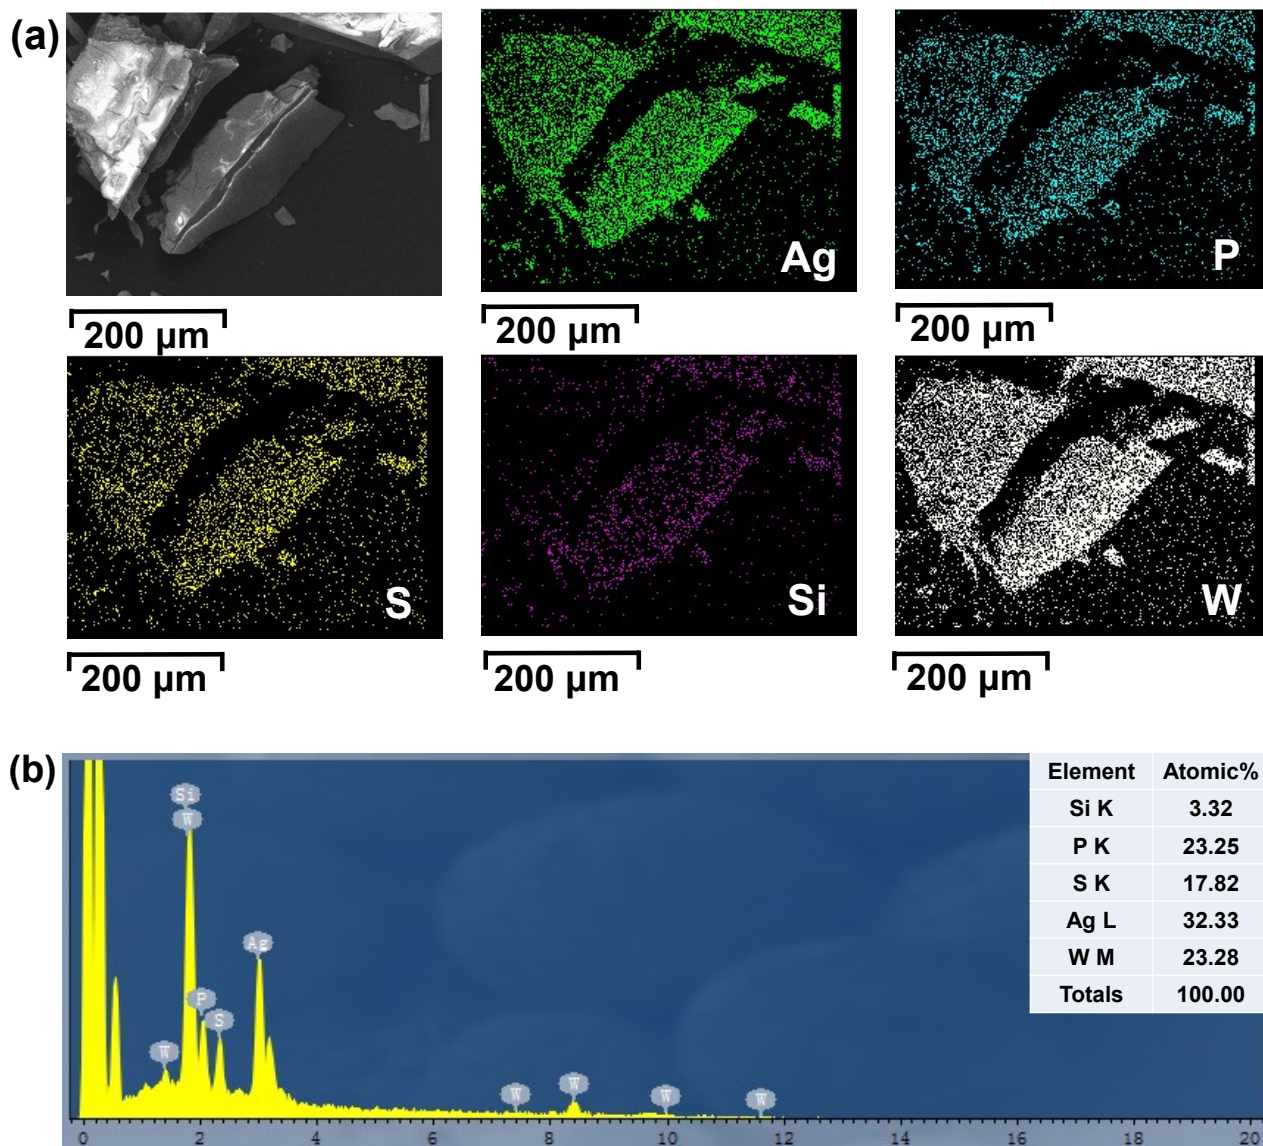

**Fig. S12** (a) SEM and elemental mapping images, and (b) EDS result of  $\text{Ag}_{24}$ .

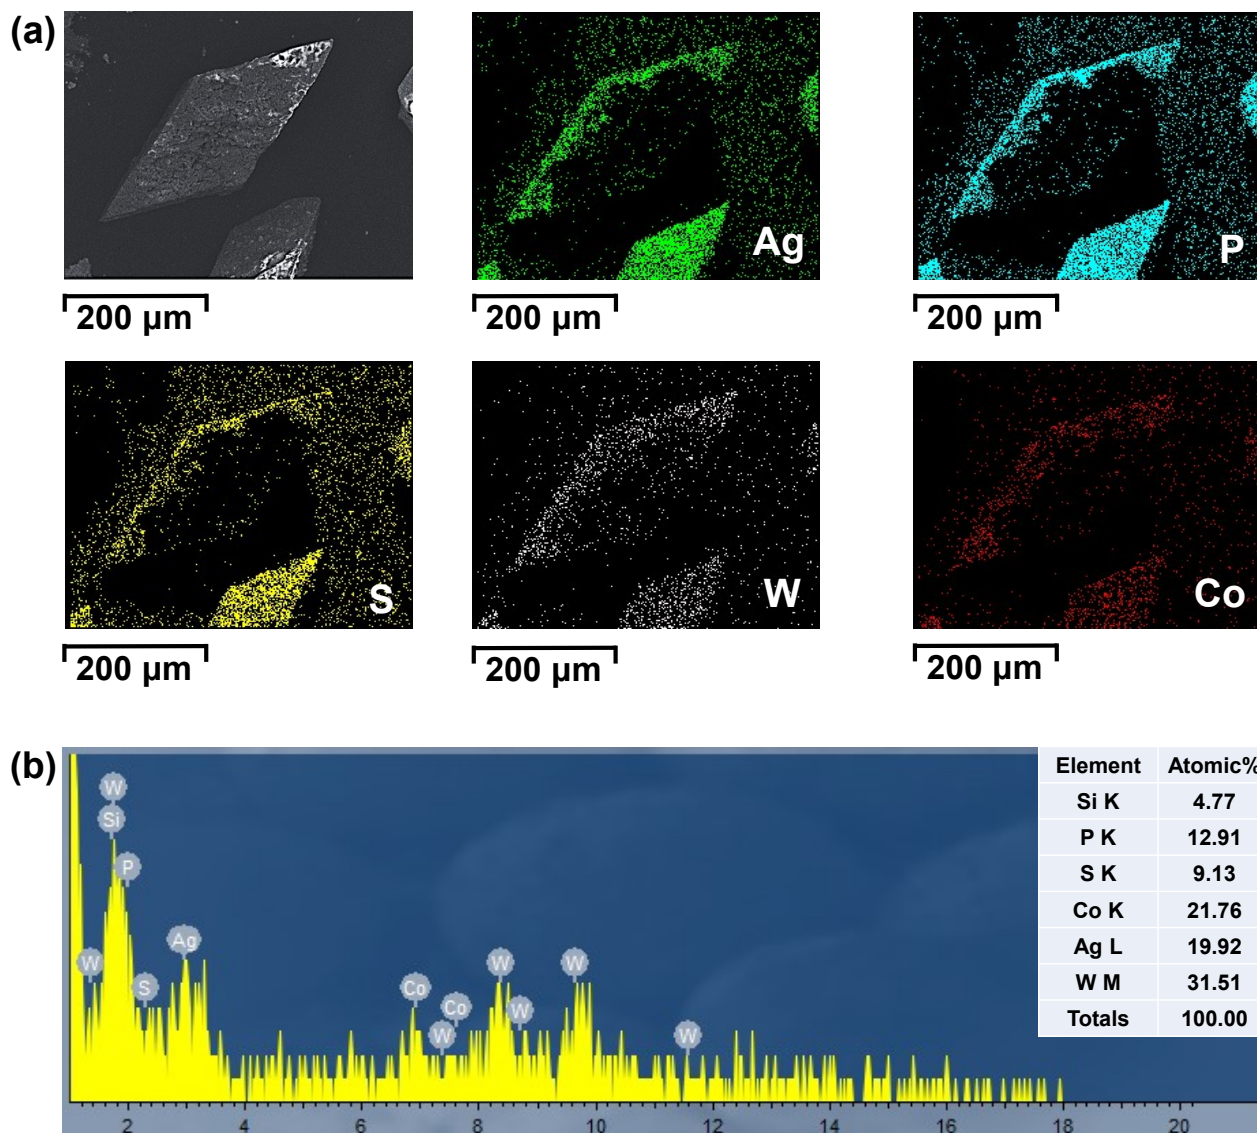

Fig. S13 (a) SEM and elemental mapping images, and (b) EDS result of  $\text{Ag}_{16}\text{Co}_8$ .

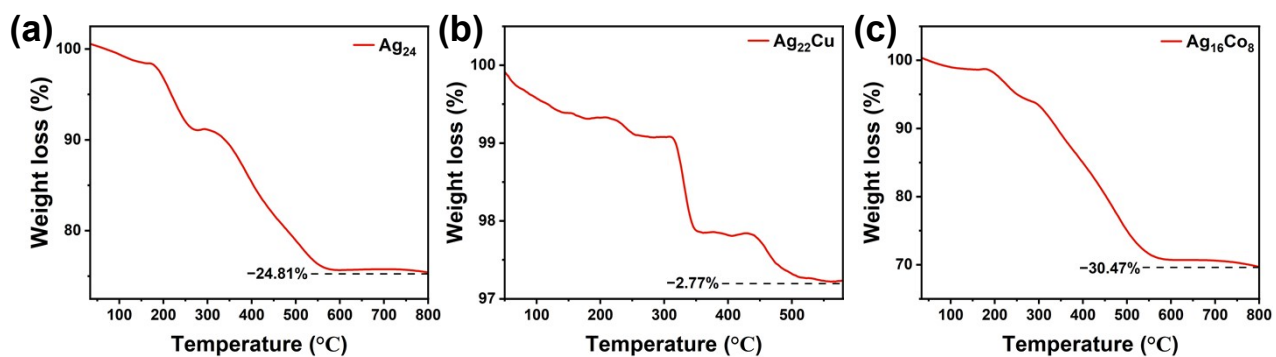

Fig. S14 TGA curves of (a)  $\text{Ag}_{24}$ , (b)  $\text{Ag}_{22}\text{Cu}$  and (c)  $\text{Ag}_{16}\text{Co}_8$  at a scanning rate of  $10\text{ }^\circ\text{C}/\text{min}$  under air atmosphere.

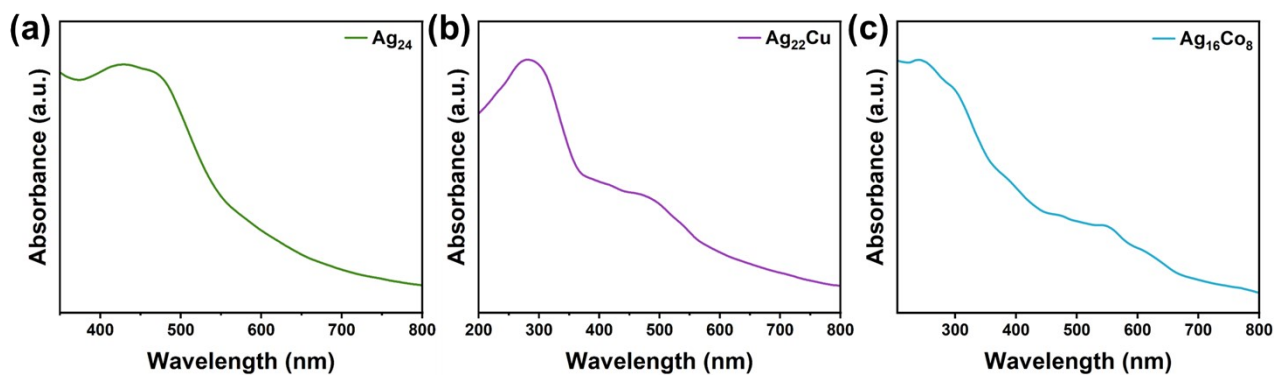

**Fig. S15** The solid-state UV-vis spectra of (a)  $\text{Ag}_{24}$ , (b)  $\text{Ag}_{22}\text{Cu}$  and (c)  $\text{Ag}_{16}\text{Co}_8$  clusters.

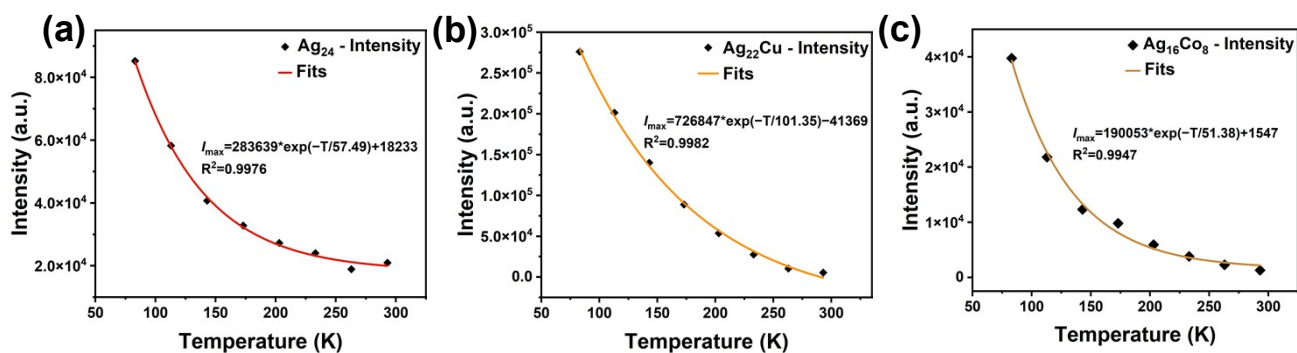

**Fig. S16** Plots of maximum emission intensity of (a)  $\text{Ag}_{24}$ , (b)  $\text{Ag}_{22}\text{Cu}$ , and (c)  $\text{Ag}_{16}\text{Co}_8$  versus temperature in the range of 83 – 293 K.

**Table S1.** Crystal data and structure refinements for **Ag<sub>24</sub>**, **Ag<sub>22</sub>Cu** and **Ag<sub>16</sub>Co<sub>8</sub>**.

| Compounds                                       | Ag <sub>24</sub>                                                                                                                              | Ag <sub>22</sub> Cu                                                                                                                                           | Ag <sub>16</sub> Co <sub>8</sub>                                                                                                                   |
|-------------------------------------------------|-----------------------------------------------------------------------------------------------------------------------------------------------|---------------------------------------------------------------------------------------------------------------------------------------------------------------|----------------------------------------------------------------------------------------------------------------------------------------------------|
| Empirical formula                               | C <sub>195</sub> H <sub>233</sub> Ag <sub>24</sub> ClO <sub>52.70</sub> P <sub>12</sub><br>S <sub>11</sub> Si <sub>1.50</sub> W <sub>15</sub> | C <sub>195</sub> H <sub>231.19</sub> Ag <sub>22</sub> ClCuF <sub>12</sub> O <sub>34</sub> P <sub>12</sub> S <sub>11</sub><br>Sb <sub>2</sub> SiW <sub>9</sub> | C <sub>250</sub> Ag <sub>16</sub> Co <sub>8</sub> N <sub>4</sub> O <sub>82</sub> P <sub>16</sub><br>S <sub>6</sub> Si <sub>2</sub> W <sub>18</sub> |
| <i>M<sub>r</sub></i> (g mol <sup>-1</sup> )     | 9568.48                                                                                                                                       | 8469.64                                                                                                                                                       | 10621.26                                                                                                                                           |
| Temperature/K                                   | 180(2)                                                                                                                                        | 180(2)                                                                                                                                                        | 180(2)                                                                                                                                             |
| Crystal system                                  | Triclinic                                                                                                                                     | monoclinic                                                                                                                                                    | Triclinic                                                                                                                                          |
| Space group                                     | <i>P</i> -1                                                                                                                                   | <i>P</i> 2 <sub>1</sub> / <i>n</i>                                                                                                                            | <i>P</i> -1                                                                                                                                        |
| <i>a</i> (Å)                                    | 21.7876(2)                                                                                                                                    | 20.8060(3)                                                                                                                                                    | 18.6002(2)                                                                                                                                         |
| <i>b</i> (Å)                                    | 21.8079(2)                                                                                                                                    | 32.6834(5)                                                                                                                                                    | 22.9769(3)                                                                                                                                         |
| <i>c</i> (Å)                                    | 59.0524(4)                                                                                                                                    | 41.5251(8)                                                                                                                                                    | 23.2397(3)                                                                                                                                         |
| <i>α</i> (°)                                    | 86.9110(1)                                                                                                                                    | 90                                                                                                                                                            | 67.8510(1)                                                                                                                                         |
| <i>β</i> (°)                                    | 86.8350(1)                                                                                                                                    | 98.7177(2)                                                                                                                                                    | 66.9270(1)                                                                                                                                         |
| <i>γ</i> (°)                                    | 80.0060(1)                                                                                                                                    | 90                                                                                                                                                            | 78.9240(1)                                                                                                                                         |
| <i>V</i> /Å <sup>3</sup>                        | 27562.3(4)                                                                                                                                    | 27911.3(8)                                                                                                                                                    | 8451.8(2)                                                                                                                                          |
| <i>Z</i>                                        | 4                                                                                                                                             | 4                                                                                                                                                             | 1                                                                                                                                                  |
| <i>ρ</i> <sub>calcd</sub> (g cm <sup>-3</sup> ) | 2.306                                                                                                                                         | 2.016                                                                                                                                                         | 2.087                                                                                                                                              |
| <i>μ</i> mm <sup>-1</sup>                       | 8.116                                                                                                                                         | 5.681                                                                                                                                                         | 7.561                                                                                                                                              |
| <i>F</i> (000)                                  | 17826                                                                                                                                         | 15997.0                                                                                                                                                       | 4848                                                                                                                                               |
| Crystal size/mm <sup>3</sup>                    | 0.1 × 0.11 × 0.12                                                                                                                             | 0.21 × 0.2 × 0.19                                                                                                                                             | 0.10 × 0.11 × 0.12                                                                                                                                 |
| limiting indices                                | -25 ≤ <i>h</i> ≤ 25<br>-25 ≤ <i>k</i> ≤ 25<br>-68 ≤ <i>l</i> ≤ 70                                                                             | -24 ≤ <i>h</i> ≤ 24<br>-38 ≤ <i>k</i> ≤ 38<br>-47 ≤ <i>l</i> ≤ 49                                                                                             | -24 ≤ <i>h</i> ≤ 21<br>-28 ≤ <i>k</i> ≤ 29<br>-29 ≤ <i>l</i> ≤ 30                                                                                  |

|                                                                                                            |                 |                 |                 |
|------------------------------------------------------------------------------------------------------------|-----------------|-----------------|-----------------|
| no. of reflections<br>collected                                                                            | 359565          | 236237          | 113256          |
| no. of independent<br>reflections                                                                          | 96956           | 49117           | 37761           |
| restrains/parameters                                                                                       | 17199/6311      | 4635/2453       | 55/1802         |
| $\theta_{\min} / \theta_{\max}$                                                                            | 1.991 / 25.000  | 1.934 / 25.000  | 2.158 / 27.499  |
| $R_{\text{int}}$                                                                                           | 0.0797          | 0.0661          | 0.0445          |
| GooF                                                                                                       | 1.219           | 1.028           | 1.021           |
| $R [I > 2\sigma]$                                                                                          | $R_1 = 0.1503$  | $R_1 = 0.1165$  | $R_1 = 0.0495$  |
|                                                                                                            | $wR_2 = 0.3287$ | $wR_2 = 0.2989$ | $wR_2 = 0.1216$ |
| $R(\text{all data})$                                                                                       | $R_1 = 0.1564$  | $R_1 = 0.1655$  | $R_1 = 0.0796$  |
|                                                                                                            | $wR_2 = 0.3312$ | $wR_2 = 0.3435$ | $wR_2 = 0.1383$ |
| $R_1 = \sum( F_o  -  F_c ) / \sum F_o $ , $wR_2 = \{\sum[w(F^2_o - F^2_c)^2] / \sum[w(F^2_o)^2]\}^{1/2}$ . |                 |                 |                 |

**Table S2.** Selected bond distances (Å) for **Ag<sub>24</sub>**.

|    |     |          |     |      |          |
|----|-----|----------|-----|------|----------|
| W1 | O1  | 1.908(1) | Ag3 | Ag8  | 2.775(9) |
| W1 | O2  | 1.903(1) | Ag3 | Ag56 | 3.300(1) |
| W1 | O3  | 1.895(1) | Ag3 | S3   | 2.410(3) |
| W1 | O4  | 1.895(1) | Ag3 | S23  | 2.570(4) |
| W1 | O14 | 1.897(1) | Ag5 | Ag22 | 3.161(7) |
| W2 | O2  | 1.900(1) | Ag5 | Ag56 | 3.032(7) |
| W2 | O7  | 1.899(1) | Ag5 | S9   | 2.380(2) |
| W2 | O8  | 1.892(1) | Ag5 | S17  | 2.350(2) |
| W2 | O9  | 1.893(1) | Ag8 | Ag21 | 2.891(7) |
| W2 | O16 | 1.896(1) | Ag8 | Ag23 | 3.004(8) |

---

|      |      |          |      |      |          |
|------|------|----------|------|------|----------|
| W3   | O1   | 1.906(1) | Ag8  | Ag51 | 3.013(9) |
| W3   | O6   | 1.897(1) | Ag8  | Ag53 | 2.956(1) |
| W3   | O7   | 1.900(1) | Ag8  | Ag56 | 2.757(5) |
| W3   | O11  | 1.896(1) | Ag8  | Ag58 | 2.683(6) |
| W3   | O15  | 1.892(1) | Ag8  | O79  | 2.470(2) |
| W4   | O4   | 1.896(1) | Ag8  | O83  | 2.420(2) |
| W4   | O5   | 1.890(4) | Ag11 | S24  | 2.610(2) |
| W4   | O9   | 1.901(1) | Ag11 | P3   | 2.253(2) |
| W4   | O10  | 1.902(1) | Ag11 | O79  | 2.550(2) |
| W4   | O17  | 1.894(1) | Ag13 | Ag22 | 3.310(1) |
| W5   | O3   | 1.897(9) | Ag13 | Ag56 | 3.035(1) |
| W5   | O10  | 1.905(9) | Ag13 | S3   | 2.390(3) |
| W5   | O11  | 1.896(1) | Ag13 | S25  | 2.400(3) |
| W5   | O12  | 1.900(1) | Ag14 | S1   | 2.499(1) |
| W5   | O18  | 1.898(1) | Ag14 | P4   | 2.402(1) |
| W6   | O5   | 1.899(1) | Ag14 | O93  | 2.350(2) |
| W6   | O6   | 1.898(1) | Ag16 | S4   | 2.472(1) |
| W6   | O8   | 1.896(1) | Ag16 | P8   | 2.381(1) |
| W6   | O12  | 1.897(1) | Ag16 | O47  | 2.330(2) |
| W6   | O13  | 1.893(1) | Ag19 | Ag42 | 3.108(8) |
| O14  | C275 | 1.600(4) | Ag19 | S9   | 2.350(2) |
| Ag   | S18  | 2.162(2) | Ag19 | S19  | 2.360(2) |
| Ag   | P5   | 2.510(2) | Ag21 | S19  | 2.410(2) |
| Ag   | O64  | 2.490(2) | Ag21 | S21  | 2.317(1) |
| Ag1A | S26A | 2.530(3) | Ag22 | S16  | 2.522(1) |
| Ag1A | P9   | 2.878(2) | Ag22 | S17  | 2.660(2) |
| Ag1A | O105 | 2.530(2) | Ag22 | S25  | 2.620(3) |
| Ag2  | Ag4  | 3.039(6) | Ag22 | P10  | 2.396(1) |
| Ag2  | Ag50 | 2.729(7) | Ag22 | O99  | 2.410(2) |

---



---

|      |      |          |      |      |          |
|------|------|----------|------|------|----------|
| Ag2  | S14  | 2.080(2) | Ag23 | S5   | 2.330(2) |
| Ag2  | S32  | 2.398(2) | Ag23 | S21  | 2.314(1) |
| Ag2  | O107 | 2.490(2) | Ag25 | S11  | 2.490(4) |
| Ag4  | Ag7  | 2.857(1) | Ag25 | S13  | 2.360(4) |
| Ag4  | Ag17 | 2.927(5) | Ag26 | S1   | 2.446(1) |
| Ag4  | Ag18 | 2.759(4) | Ag26 | P23  | 2.383(1) |
| Ag4  | Ag27 | 2.935(1) | Ag28 | Ag41 | 3.270(9) |
| Ag4  | Ag35 | 2.792(6) | Ag28 | S4   | 2.386(1) |
| Ag4  | Ag44 | 2.803(4) | Ag28 | S24  | 2.500(2) |
| Ag4  | Ag45 | 3.077(7) | Ag28 | S24A | 2.290(2) |
| Ag4  | Ag50 | 2.725(4) | Ag31 | Ag39 | 3.330(8) |
| Ag4  | Ag57 | 2.998(1) | Ag31 | S3   | 2.76(3)  |
| Ag4  | Ag61 | 2.853(2) | Ag31 | S16  | 2.467(2) |
| Ag4  | Cl2  | 2.406(1) | Ag31 | P15  | 2.440(2) |
| Ag6  | S10  | 2.450(1) | Ag31 | O77  | 2.460(2) |
| Ag6  | P12  | 2.389(1) | Ag32 | S1   | 2.369(1) |
| Ag7  | S15  | 2.250(7) | Ag32 | S16  | 2.386(1) |
| Ag7  | S31  | 2.480(4) | Ag32 | O61  | 2.530(2) |
| Ag9  | Ag30 | 3.257(7) | Ag39 | Ag56 | 2.666(7) |
| Ag9  | S26  | 2.485(2) | Ag39 | S5   | 2.360(2) |
| Ag9  | P21  | 2.450(2) | Ag39 | S17  | 2.560(2) |
| Ag9  | O54  | 2.500(2) | Ag39 | O77  | 2.520(2) |
| Ag9A | S26A | 2.530(3) | Ag40 | S6   | 2.430(1) |
| Ag9A | P21  | 2.240(2) | Ag40 | P6   | 2.367(1) |
| Ag9A | O54  | 2.400(2) | Ag41 | S24  | 2.460(2) |
| Ag10 | S8   | 2.502(1) | Ag41 | P11  | 2.550(3) |
| Ag10 | P13  | 2.405(1) | Ag41 | O83  | 2.490(2) |
| Ag10 | O76  | 2.330(2) | Ag42 | S9   | 2.960(2) |
| Ag12 | S10  | 2.476(1) | Ag42 | S11  | 2.680(4) |

|      |      |          |      |      |          |
|------|------|----------|------|------|----------|
| Ag12 | P20  | 2.363(1) | Ag42 | S20  | 2.529(1) |
| Ag12 | O50  | 2.350(2) | Ag42 | P1   | 2.400(1) |
| Ag15 | Ag34 | 3.085(7) | Ag42 | O103 | 2.430(2) |
| Ag15 | S28  | 2.341(2) | Ag43 | S20  | 2.769(2) |
| Ag15 | S30  | 2.390(2) | Ag43 | P19  | 2.390(2) |
| Ag17 | Ag20 | 3.132(6) | Ag43 | O110 | 2.440(2) |
| Ag17 | Ag50 | 2.989(6) | Ag47 | S4   | 2.451(1) |
| Ag17 | S14  | 2.490(2) | Ag47 | P14  | 2.385(1) |
| Ag17 | S28  | 2.396(2) | Ag48 | Ag60 | 3.063(1) |
| Ag18 | Ag27 | 2.702(1) | Ag48 | S6   | 2.352(1) |
| Ag18 | Ag35 | 2.882(6) | Ag48 | S20  | 2.355(1) |
| Ag18 | Ag44 | 2.718(5) | Ag48 | O95  | 2.480(2) |
| Ag18 | Ag45 | 2.989(7) | Ag49 | S11  | 2.420(4) |
| Ag18 | Ag50 | 2.766(5) | Ag49 | S25  | 2.420(3) |
| Ag18 | Ag61 | 2.980(2) | Ag51 | S13  | 2.270(4) |
| Ag18 | O54  | 2.380(2) | Ag51 | S23  | 2.480(4) |
| Ag18 | O104 | 2.600(2) | Ag52 | S6   | 2.479(1) |
| Ag18 | O105 | 2.440(2) | Ag52 | P2   | 2.398(1) |
| Ag20 | Ag29 | 2.748(2) | Ag52 | O89  | 2.600(2) |
| Ag20 | S22  | 2.549(1) | Ag53 | Ag56 | 2.270(1) |
| Ag20 | S31  | 2.510(4) | Ag53 | O86  | 2.540(2) |
| Ag20 | P17  | 2.406(1) | Ag53 | O103 | 2.100(2) |
| Ag20 | O90  | 2.410(2) | Ag56 | Ag58 | 2.813(6) |
| Ag24 | S8   | 2.450(1) | Ag56 | O77  | 2.540(2) |
| Ag24 | P7   | 2.394(1) | Ag56 | O80  | 2.450(2) |
| Ag27 | Ag55 | 3.280(2) | Ag56 | O99  | 2.380(2) |
| Ag27 | S27  | 2.470(4) | Ag58 | O103 | 2.490(2) |
| Ag27 | S29  | 2.550(5) | Ag58 | O110 | 2.390(2) |
| Ag29 | Ag50 | 3.090(1) | Ag60 | S20  | 2.224(2) |

---

---

|      |      |          |      |      |          |
|------|------|----------|------|------|----------|
| Ag29 | S27  | 2.640(4) | Ag60 | P19  | 2.430(2) |
| Ag29 | S31  | 2.220(4) | Ag60 | O110 | 2.530(2) |
| Ag30 | S10  | 2.386(1) | Ag62 | S24A | 2.540(2) |
| Ag30 | S26  | 2.483(2) | Ag62 | P3   | 2.785(2) |
| Ag30 | S26A | 2.270(3) | Ag62 | O79  | 2.570(2) |
| Ag33 | S26  | 2.593(1) | Ag54 | O98  | 2.480(2) |
| Ag33 | P9   | 2.326(1) | Ag55 | S7   | 2.380(4) |
| Ag33 | O105 | 2.510(2) | Ag55 | S29  | 2.420(5) |
| Ag34 | S18  | 2.507(1) | Ag57 | S7   | 2.380(4) |
| Ag34 | P16  | 2.397(1) | Ag57 | S15  | 1.930(6) |
| Ag34 | O58  | 2.430(2) | Ag59 | S22  | 2.428(2) |
| Ag35 | Ag45 | 3.303(8) | Ag59 | S27  | 2.830(4) |
| Ag35 | S2   | 2.470(2) | Ag59 | P24  | 2.318(2) |
| Ag35 | S30  | 2.448(2) | Ag59 | O107 | 2.470(2) |
| Ag36 | S8   | 2.360(1) | Ag61 | O58  | 2.070(3) |
| Ag36 | S22  | 2.377(1) | Ag61 | O62  | 2.540(3) |
| Ag36 | O84  | 2.500(2) | Ag46 | S12  | 2.471(1) |
| Ag37 | S18  | 2.713(2) | Ag46 | P22  | 2.368(1) |
| Ag37 | P5   | 2.384(2) | Ag50 | Ag61 | 2.170(2) |
| Ag37 | O64  | 2.420(2) | Ag50 | O90  | 2.390(2) |
| Ag38 | S12  | 2.416(1) | Ag50 | O92  | 2.410(2) |
| Ag38 | P18  | 2.351(1) | Ag50 | O107 | 2.590(2) |
| Ag44 | Ag50 | 2.758(6) | Ag54 | S12  | 2.392(1) |
| Ag44 | O58  | 2.450(2) | Ag54 | S18  | 2.364(1) |
| Ag44 | O64  | 2.420(2) | Si3  | O67  | 1.610(2) |
| Ag45 | S2   | 2.430(2) | Ag45 | S32  | 2.350(2) |

---

**Table S3.** BVS values for Si and W atoms of **Ag<sub>24</sub>**.

|    |       |     |       |
|----|-------|-----|-------|
| W1 | 5.832 | W28 | 6.161 |
| W3 | 6.133 | W32 | 5.874 |
| W6 | 6.111 | W39 | 6.059 |
| W7 | 6.222 | W40 | 6.106 |
| W8 | 6.039 | Si1 | 3.939 |

**Table S4.** Selected bond distances (Å) for **Ag<sub>22</sub>Cu**.

|    |     |          |      |      |          |
|----|-----|----------|------|------|----------|
| W1 | O1  | 1.711(2) | Ag1A | Ag2A | 2.806(6) |
| W1 | O4  | 2.001(1) | Ag1A | Ag3A | 2.751(4) |
| W1 | O6  | 1.932(2) | Ag1A | Ag4  | 2.753(4) |
| W1 | O7  | 2.362(2) | Ag1A | O26  | 2.552(2) |
| W1 | O9  | 1.879(1) | Ag1A | O29  | 2.380(2) |
| W1 | O10 | 1.990(1) | Ag1A | O30  | 2.555(2) |
| W2 | O3  | 1.735(2) | Ag1A | Ag2  | 3.370(8) |
| W2 | O5  | 1.948(2) | Ag1A | Ag3  | 3.057(6) |
| W2 | O6  | 1.938(2) | Ag2A | Ag3A | 2.731(5) |
| W2 | O7  | 2.321(1) | Ag2A | Ag4  | 2.744(4) |
| W2 | O8  | 1.887(1) | Ag2A | O27  | 2.516(2) |
| W2 | O13 | 1.939(2) | Ag2A | O31  | 2.598(2) |
| W3 | O2  | 1.713(2) | Ag2A | O32  | 2.457(2) |
| W3 | O4  | 1.893(1) | Ag2A | Ag1  | 2.835(8) |
| W3 | O5  | 1.934(2) | Ag3A | Ag4  | 2.824(3) |
| W3 | O7  | 2.335(1) | Ag3A | O33  | 2.521(2) |
| W3 | O11 | 1.893(2) | Ag3A | O34  | 2.400(2) |
| W3 | O12 | 1.978(2) | Ag3A | Ag1  | 3.097(7) |
| W4 | O10 | 2.182(1) | Ag3A | Cu6A | 3.044(9) |

|    |     |          |      |      |          |
|----|-----|----------|------|------|----------|
| W4 | O15 | 1.920(2) | Ag3A | Ag3  | 3.094(6) |
| W4 | O16 | 1.725(2) | Ag1B | Ag2B | 2.797(1) |
| W4 | O17 | 1.840(2) | Ag1B | Ag3B | 2.626(1) |
| W4 | O26 | 2.272(2) | Ag1B | Ag4  | 2.695(8) |
| W4 | O30 | 1.790(2) | Ag1B | O30  | 2.388(2) |
| W5 | O9  | 2.055(1) | Ag1B | Ag38 | 3.277(9) |
| W5 | O14 | 1.744(2) | Ag1B | Ag41 | 2.675(1) |
| W5 | O15 | 1.980(2) | Ag2B | Ag3B | 2.789(1) |
| W5 | O25 | 1.835(2) | Ag2B | Ag4  | 2.780(8) |
| W5 | O26 | 2.310(2) | Ag2B | O33  | 2.451(2) |
| W5 | O29 | 1.753(2) | Ag2B | Ag39 | 2.758(1) |
| W6 | O8  | 2.152(1) | Ag3B | Ag4  | 2.791(7) |
| W6 | O23 | 1.930(2) | Ag3B | O29  | 2.531(2) |
| W6 | O24 | 1.746(2) | Ag3B | O34  | 2.459(2) |
| W6 | O25 | 1.849(2) | Ag3B | Ag3  | 2.202(9) |
| W6 | O28 | 2.285(2) | Ag4  | Ag39 | 2.928(7) |
| W6 | O34 | 1.768(2) | Ag4  | Ag41 | 2.865(7) |
| W7 | O13 | 2.144(2) | Ag4  | Ag1  | 2.813(7) |
| W7 | O21 | 1.843(2) | Ag4  | Cu6A | 2.925(9) |
| W7 | O22 | 1.733(1) | Ag4  | Cl25 | 2.412(7) |
| W7 | O23 | 1.940(2) | Ag4  | Ag3  | 2.871(6) |
| W7 | O28 | 2.256(2) | O14  | Ag8A | 2.460(2) |
| W7 | O33 | 1.747(2) | O14  | Ag8B | 2.590(2) |
| W8 | O12 | 2.147(2) | O18  | Ag19 | 2.579(2) |
| W8 | O19 | 1.900(2) | O20  | Ag13 | 2.500(2) |
| W8 | O20 | 1.753(2) | O22  | Ag14 | 2.470(2) |
| W8 | O21 | 1.859(2) | O23  | Ag20 | 2.570(2) |
| W8 | O27 | 2.269(2) | O29  | Ag6  | 2.460(2) |
| W8 | O32 | 1.797(2) | O30  | Ag5A | 2.476(2) |

|      |     |          |      |      |          |
|------|-----|----------|------|------|----------|
| W9   | O11 | 2.154(1) | O30  | Ag5B | 2.417(2) |
| W9   | O17 | 1.840(2) | O31  | Ag10 | 2.408(2) |
| W9   | O18 | 1.741(2) | O32  | Ag9A | 2.413(2) |
| W9   | O19 | 1.930(2) | O32  | Ag9B | 2.395(2) |
| W9   | O27 | 2.288(2) | O33  | Ag11 | 2.417(2) |
| W9   | O31 | 1.750(2) | O34  | Ag7  | 2.494(2) |
| Si1  | O7  | 1.674(1) | Ag15 | S4   | 2.407(1) |
| Si1  | O26 | 1.610(2) | Ag15 | P18  | 2.379(1) |
| Si1  | O27 | 1.620(2) | P1A  | Ag9A | 2.370(3) |
| Si1  | O28 | 1.632(2) | Ag20 | S2   | 2.385(9) |
| Ag11 | S2  | 2.500(1) | Ag20 | S4   | 2.387(1) |
| Ag11 | S10 | 2.758(1) | P1B  | Ag9B | 2.396(2) |
| Ag12 | S3  | 2.358(9) | Ag39 | S10  | 2.576(1) |
| Ag12 | S11 | 2.349(1) | Ag39 | S9B  | 2.746(1) |
| Ag13 | S3  | 2.444(9) | P11  | Ag11 | 2.396(8) |
| Ag14 | S4  | 2.456(1) | P12  | Ag7  | 2.395(9) |
| Ag18 | S5  | 2.355(1) | Ag38 | Ag41 | 3.342(8) |
| Ag19 | S3  | 2.440(9) | Ag38 | S6   | 2.314(2) |
| Ag41 | S8  | 2.534(1) | Ag38 | S8   | 2.443(1) |
| Ag41 | S9B | 2.187(1) | P13  | Ag6  | 2.367(1) |
| Ag5B | P20 | 2.729(1) | P14  | Ag14 | 2.374(8) |
| Ag5B | S5  | 2.845(2) | P15  | Ag13 | 2.359(9) |
| Ag5B | S8  | 2.007(2) | P16  | Ag19 | 2.384(9) |
| Ag6  | S5  | 2.491(1) | P17  | Ag35 | 2.376(9) |
| Ag6  | S6  | 2.626(2) | S1   | Ag8A | 2.360(1) |
| Ag7  | S2  | 2.542(8) | S1   | Ag8B | 2.536(1) |
| Ag7  | S7  | 2.516(1) | S1   | Ag18 | 2.370(1) |
| Ag8A | P21 | 2.406(2) | Ag5B | Ag38 | 2.469(1) |
| Ag8B | P21 | 2.382(2) | Ag5A | S5   | 2.380(1) |

|      |      |          |      |      |          |
|------|------|----------|------|------|----------|
| Ag9A | S11  | 2.654(1) | Ag5A | S8   | 2.816(1) |
| Ag9B | Ag39 | 2.950(8) | Ag5A | P20  | 2.364(1) |
| Ag9B | S11  | 2.520(1) | Ag10 | S11  | 2.430(1) |
| Ag9B | S9B  | 2.841(8) | S1   | Ag35 | 2.430(1) |
| Ag10 | P19  | 2.385(1) | S1   | C304 | 1.780(5) |

**Table S5.** BVS values for Si and W atoms of  $\text{Ag}_{22}\text{Cu}$ .

|    |       |     |       |
|----|-------|-----|-------|
| W1 | 5.732 | W6  | 6.151 |
| W2 | 5.862 | W7  | 6.330 |
| W3 | 5.996 | W8  | 6.081 |
| W4 | 6.184 | W9  | 6.270 |
| W5 | 6.279 | Si1 | 4.688 |

**Table S6.** Selected bond distances ( $\text{\AA}$ ) for  $\text{Ag}_{16}\text{Co}_8$ .

|    |     |          |    |     |          |
|----|-----|----------|----|-----|----------|
| W1 | O1  | 2.312(6) | P7 | Ag3 | 2.337(4) |
| W1 | O19 | 1.723(7) | W4 | O24 | 1.840(7) |
| W1 | O3  | 1.999(6) | W6 | O20 | 1.995(6) |
| W1 | O9  | 1.792(7) | W6 | O2  | 2.009(6) |
| W1 | O27 | 1.914(6) | W6 | O13 | 1.720(6) |
| W1 | O26 | 1.993(6) | W6 | O29 | 2.381(6) |
| W4 | O21 | 1.851(6) | W6 | O23 | 1.843(6) |
| W4 | O20 | 1.988(6) | W6 | O26 | 1.833(6) |
| W4 | O2  | 1.990(6) | W8 | O3  | 1.853(6) |
| W4 | O6  | 1.727(6) | W8 | O37 | 1.729(7) |
| W4 | O29 | 2.422(6) | W8 | O8  | 1.930(6) |
| W8 | O41 | 2.329(6) | W5 | O12 | 1.839(6) |

|     |     |          |     |     |          |
|-----|-----|----------|-----|-----|----------|
| W8  | O23 | 1.979(6) | W5  | O41 | 2.384(6) |
| W8  | O40 | 1.888(6) | W5  | O32 | 2.002(6) |
| W9  | O21 | 1.967(5) | W5  | O25 | 1.846(6) |
| W9  | O5  | 1.917(6) | W5  | O40 | 1.978(7) |
| W9  | O11 | 1.731(7) | W3  | O18 | 1.714(7) |
| W9  | O4  | 2.017(7) | W3  | O4  | 1.849(7) |
| W9  | O14 | 1.786(7) | W3  | O8  | 1.946(6) |
| W9  | O22 | 2.305(6) | W3  | O41 | 2.327(6) |
| W5  | O7  | 1.720(7) | O9  | Ag3 | 2.356(7) |
| W3  | O32 | 1.873(6) | Ag9 | O15 | 2.569(7) |
| W3  | O24 | 1.981(6) | Ag5 | S1  | 2.423(3) |
| W7  | O35 | 1.728(6) | Ag5 | P1  | 2.354(3) |
| W7  | O1  | 2.338(6) | Ag5 | O14 | 2.452(7) |
| W7  | O12 | 2.015(6) | Ag1 | S2  | 2.404(3) |
| W7  | O30 | 1.788(7) | Ag1 | P5  | 2.375(4) |
| W7  | O27 | 1.962(6) | Ag1 | O35 | 2.557(7) |
| W7  | O28 | 1.897(7) | Ag7 | S3  | 2.308(1) |
| W2  | O5  | 1.941(7) | Ag7 | P7  | 2.455(8) |
| W2  | O15 | 1.731(6) | Ag7 | O9  | 2.460(1) |
| W2  | O16 | 1.790(7) | Co1 | O20 | 2.011(6) |
| W2  | O22 | 2.365(6) | Co1 | O2  | 2.359(6) |
| W2  | O25 | 2.010(6) | Co1 | O29 | 2.041(6) |
| W2  | O28 | 1.915(7) | Co1 | O42 | 2.023(7) |
| Ag2 | S1  | 2.386(3) | Co1 | O39 | 2.013(6) |
| Ag2 | P2  | 2.368(3) | Co4 | O1  | 2.291(6) |
| Ag4 | S1  | 2.458(3) | Co4 | O9  | 2.061(7) |
| Ag4 | P8  | 2.361(3) | Co4 | O10 | 2.031(7) |
| Ag4 | O16 | 2.379(7) | Co4 | O36 | 2.127(7) |
| Ag4 | O17 | 2.482(7) | Co4 | O30 | 2.060(6) |



|     |     |          |     |     |          |
|-----|-----|----------|-----|-----|----------|
| Ag6 | S3  | 2.437(3) | Co4 | O39 | 2.018(6) |
| Ag6 | P6  | 2.359(3) | Co2 | Co3 | 2.995(2) |
| Ag6 | O30 | 2.315(7) | Co2 | O42 | 2.022(6) |
| Ag8 | Ag7 | 3.244(2) | Co2 | O10 | 2.055(7) |
| Ag8 | S3  | 2.369(3) | Co2 | O14 | 2.068(7) |
| Ag8 | P3  | 2.364(3) | Co2 | O16 | 2.040(6) |
| Ag9 | Ag1 | 3.157(1) | Co2 | O17 | 2.111(7) |
| Ag9 | P4  | 2.376(3) | Co2 | O22 | 2.284(6) |
| Ag9 | S2  | 2.405(3) | Co3 | O34 | 2.106(8) |
| Co3 | O42 | 2.129(7) | S3  | Ag3 | 2.584(5) |
| Co3 | O10 | 2.104(6) | Si  | O1  | 1.629(6) |
| Co3 | O38 | 2.083(7) | Si  | O29 | 1.663(6) |
| Co3 | O39 | 2.131(7) | Si  | O41 | 1.658(6) |
| Co3 | O31 | 2.084(7) | Si  | O22 | 1.624(7) |

---

**Table S7.** BVS values for Si, W, Co and O atoms of **Ag<sub>16</sub>Co<sub>8</sub>**.

|     |       |     |       |
|-----|-------|-----|-------|
| W1  | 6.058 | W8  | 6.072 |
| W2  | 6.081 | W9  | 6.065 |
| W3  | 6.154 | Co1 | 1.805 |
| W4  | 5.999 | Co2 | 2.091 |
| W5  | 6.075 | Co3 | 1.962 |
| W6  | 6.054 | Co4 | 2.059 |
| W7  | 6.112 | Si1 | 3.799 |
| O10 | 1.117 | O39 | 1.069 |
| O42 | 1.093 |     |       |

---

**Table S8.** Comparison of photothermal performance to the reported literature works.

| Formula                                                                                                                                                                                                                                                                                                                                                                                                                                                    | Photothermal Conditions                                                                 | Maximum Temperature (°C) | Heating Rate (°C s <sup>-1</sup> ) | Ref              |
|------------------------------------------------------------------------------------------------------------------------------------------------------------------------------------------------------------------------------------------------------------------------------------------------------------------------------------------------------------------------------------------------------------------------------------------------------------|-----------------------------------------------------------------------------------------|--------------------------|------------------------------------|------------------|
| [(SiW <sub>9</sub> O <sub>34</sub> )@Ag <sub>24</sub> ( <sup>t</sup> PrS) <sub>11</sub> (DPPP) <sub>6</sub> Cl] <sub>2</sub> (SiW <sub>12</sub> O <sub>40</sub> )                                                                                                                                                                                                                                                                                          | 532 nm<br>1 W cm <sup>-2</sup>                                                          | 133                      | 8.86                               | <b>This work</b> |
| [(SiW <sub>9</sub> O <sub>34</sub> )@Ag <sub>22</sub> Cu( <sup>t</sup> PrS) <sub>11</sub> (DPPP) <sub>6</sub> Cl](SbF <sub>6</sub> ) <sub>2</sub>                                                                                                                                                                                                                                                                                                          |                                                                                         | 183.9                    | 12.26                              |                  |
| {Ag <sub>16</sub> ( <sup>t</sup> PrS) <sub>6</sub> (DPPP) <sub>8</sub> (CH <sub>3</sub> COO) <sub>4</sub> [Co <sub>4</sub> (OH) <sub>3</sub> SiW <sub>9</sub> O <sub>33</sub> ] <sub>2</sub> }(CH <sub>3</sub> CN) <sub>4</sub> (H <sub>2</sub> O) <sub>2</sub>                                                                                                                                                                                            |                                                                                         | 150.7                    | 10.05                              |                  |
| [(Mo <sub>7</sub> O <sub>25</sub> )(Mo <sub>6</sub> O <sub>22</sub> )(MoO <sub>4</sub> )@Ag <sub>72</sub> (TC4A) <sub>7</sub> ( <sup>t</sup> BuPhS) <sub>26</sub> <sup>-</sup> (CH <sub>3</sub> CN) <sub>9</sub> (H <sub>2</sub> O)]·11CH <sub>3</sub> CN·CH <sub>2</sub> Cl <sub>2</sub> ;<br>{[Cl <sub>2</sub> @Ag <sub>32</sub> (TC4A) <sub>4</sub> ( <sup>t</sup> BuPhS) <sub>8</sub> (PhCOO) <sub>6</sub> (MeCN) <sub>3</sub> ]·4MeCN} <sub>n</sub> . | 450 nm<br>0.3 W cm <sup>-2</sup>                                                        | 56<br>142                | 9.44<br>25.11                      | [4]              |
| [Ag <sub>31-x</sub> Cu <sub>x</sub> Br <sub>2</sub> (FUR) <sub>20</sub> (TPP) <sub>10</sub> ] <sup>3+</sup> (0 ≤ x ≤ 8)                                                                                                                                                                                                                                                                                                                                    | 1 W cm <sup>-2</sup><br>532 nm<br>660 nm<br>808 nm                                      | 122<br>102<br>100        | —                                  | [5]              |
| {Ag <sub>4</sub> [(TC4A) <sub>6</sub> (V <sub>9</sub> O <sub>16</sub> )](CyS) <sub>3</sub> };<br>{Ag <sub>43</sub> S[(TC4A) <sub>2</sub> (V <sub>4</sub> O <sub>9</sub> )] <sub>3</sub> (CyS) <sub>9</sub> (PhCOO) <sub>3</sub> Cl <sub>3</sub> (SO <sub>4</sub> ) <sub>4</sub> (DMF) <sub>3</sub> ·6DMF}.                                                                                                                                                 | 660 nm<br>0.9 W cm <sup>-2</sup>                                                        | 194<br>105               | 115<br>55.3                        | [6]              |
| [(CrO <sub>4</sub> ) <sub>6</sub> @Ag <sub>54</sub> Cl(TC <sub>4</sub> A) <sub>6</sub> (CyS) <sub>15</sub> (OAc) <sub>2</sub> (CH <sub>3</sub> CN) <sub>2</sub> ]·3CH <sub>3</sub> CN;<br>[(CrO <sub>4</sub> )Cl <sub>3</sub> @Ag <sub>33</sub> (TC <sub>4</sub> A) <sub>4</sub> <sup>-</sup> (CyS) <sub>10</sub> (OAc) <sub>2</sub> (CH <sub>3</sub> CN) <sub>2</sub> ]·4CH <sub>3</sub> CN·2CH <sub>2</sub> Cl <sub>2</sub> .                            | 808 nm<br>0.7 W cm <sup>-2</sup>                                                        | 411<br>150               | 403<br>134                         | [7]              |
| [(Ag <sub>18</sub> (Mo <sub>2</sub> O <sub>5</sub> PTC4A) <sub>6</sub> (EtS) <sub>6</sub> (Tos) <sub>2</sub> ]·2Ag(CH <sub>3</sub> CN) <sub>3</sub> ·4CHCl <sub>3</sub>                                                                                                                                                                                                                                                                                    | 808 nm<br>0.35 W cm <sup>-2</sup><br>0.25 W cm <sup>-2</sup><br>0.15 W cm <sup>-2</sup> | 360<br>295<br>188        | 84.3<br>68<br>41.25                | [8]              |
| [W <sub>10</sub> O <sub>32</sub> @Ag <sub>48</sub> (CyS) <sub>24</sub> (NO <sub>3</sub> ) <sub>16</sub> ]·4NO <sub>3</sub> (Cy = cyclohexyl) ( <b>Ag48T</b> )                                                                                                                                                                                                                                                                                              | 660 nm,<br>0.3 W cm <sup>-2</sup><br>0.4 W cm <sup>-2</sup><br>0.5 W cm <sup>-2</sup>   | >650 °C                  | 79.94<br>134.36<br>161.92          | [9]              |

## References

1. Z. Wang, H.-F. Su, X.-P. Wang, Q.-Q. Zhao, C.-H. Tung, D. Sun and L.-S. Zheng, *Chemistry*, 2018, **24**, 1640-1650.
2. T. Minato, K. Suzuki, K. Kamata and N. Mizuno, *Chemistry*, 2014, **20**, 5946-5952.
3. N. E. Brese and M. O'Keeffe, *Acta Cryst*, 1991, **47**, 192-197.
4. Z. Wang, Y.-J. Zhu, O. Ahlstedt, K. Konstantinou, J. Akola, C.-H. Tung, F. Alkan and D. Sun, *Angew. Chem. Int. Ed*, 2024, **63**, e202314515.
5. L. Fang, W. Fan, G. Bian, R. Wang, Q. You, W. Gu, N. Xia, L. Liao, J. Li, H. Deng, N. Yan and Z. Wu, *Angew. Chem. Int. Ed*, 2023, **62**, e202305604.
6. Z. Wang, Y.-J. Zhu, B.-L. Han, Y.-Z. Li, C.-H. Tung and D. Sun, *Nat. Commun*, 2023, **14**, 5295.
7. Z. Wang, Y. Wang, T.-Y. Xu, L. Li, C. M. Aikens, Z.-Y. Gao, M. Azam, C.-H. Tung and D. Sun, *Angew. Chem. Int. Ed*, 2024, **n/a**, e202403464.
8. Z. Wang, L. Li, L. Feng, Z. Y. Gao, C. H. Tung, L. S. Zheng and D. Sun, *Angew. Chem. Int. Ed*, 2022, **61**, e202200823.
9. K. Sheng, Z. Wang, L. Li, Z.-Y. Gao, C.-H. Tung and D. Sun, *J. Am. Chem. Soc*, 2023, **145**, 10595-10603.
